# Supplementary material
Source: PubMed Central journal article supplement (PMC7540721)
Supplement: NIHMS1562317-supplement-1.pdf [file NIHMS1562317-supplement-1.pdf]

| Strain                                             | Source            | Identifier                                           |
|----------------------------------------------------|-------------------|------------------------------------------------------|
| <i>Bacteroides thetaiotaomicron</i> VPI-5482       | ATCC              | ATCC 29148                                           |
| <i>Bacteroides fragilis</i> NTC9343                | ATCC              | ATCC 25285                                           |
| <i>Bacteroides ovatus</i>                          | ATCC              | ATCC 8483                                            |
| <i>Clostridium scindens</i>                        | ATCC              | ATCC 35704                                           |
| <i>Ruminococcus gnavus</i>                         | ATCC              | ATCC 29149                                           |
| <i>E. coli</i> S17-1                               | Justin Sonnenburg |                                                      |
| <i>E. coli</i> S17-1 pNBU2::Rg-DCA-3epimerase-WT   | This Study        |                                                      |
| <i>E. coli</i> S17-1 pNBU2::Rg-DCA-3epimerase-CD   | This Study        |                                                      |
| <i>B.theta</i> attB::Rg-DCA-3epimerase-WT          | This Study        |                                                      |
| <i>B.theta</i> attB::Rg-DCA-3epimerase-CD          | This Study        |                                                      |
| <i>B.fragilis</i> attB::Rg-DCA-3epimerase-WT       | This Study        |                                                      |
| <i>B.fragilis</i> attB::Rg-DCA-3epimerase-CD       | This Study        |                                                      |
| <i>B. ovatus</i> attB::Rg-DCA-3epimerase-WT        | This Study        |                                                      |
| <i>B. ovatus</i> attB::Rg-DCA-3epimerase-CD        | This Study        |                                                      |
| Plasmid                                            | Source            | Description                                          |
| pWW3806: Amp <sup>Ri</sup> -ermG-RP4/R6K- P_BfP1E6 | Justin Sonnenburg | Upstream half of vector                              |
| pWW3810: Term-NBU2-Amp <sup>Rii</sup>              | Justin Sonnenburg | Downstream half of vector                            |
| pDK42: pNBU2-Rg-DCA-3epimerase-WT                  | This study        | Functional copies of <i>Rg02133</i> , <i>Rg00694</i> |
| pDK43: pNBU2-Rg-DCA-3epimerase-CD                  | This study        | Functional <i>Rg02133</i> , <i>Rg00694</i> Y165F     |

**Table S1 – Bacterial strains and plasmids used in this study.**
